# Supplementary material for: Using preceptors to improve nursing students' clinical learning outcomes: A Malawian students' perspective
Source: PubMed Central journal article supplement — Int J Nurs Sci. 2017 Mar 6;4(2):164–8. doi: 10.1016/j.ijnss.2017.03.001 (PMC6626121; doi:10.1016/j.ijnss.2017.03.001), 2017-03-06
Supplement: mmc1.pdf [file mmc1.pdf]

# 临床导师对护理专业学生临床学习效果的影响：

## 马拉维学生的观点

Ellemes Phuma-Ngaiyaye, Thokozani Bvumbwe, Mep Chipeta

### 【摘要】

**目的** 临床环境仍然是提高学生能力、信心和实现他们的预期学习效果的重要因素。指导教师和导师通过提供持续的支持和资源来帮助学生实现自己的专业目标，发挥了重要的作用。本研究探讨了学生对应用临床导师制提高其临床学习效果的观点。

**方法** 研究人员采用半结构化访谈收集质性研究资料。采用立意和方便抽样方法选取了 8 所医院 48 名学生参与研究。采用内容分析法对资料进行分析。

**结果** 研究提取出两个主题：创建积极的临床学习环境；推进临床学术协作。

**结论** 该研究表明，学生通过导师的支持能在临床实践中获得更多信心、能力以及临床学习效果。建议培训更多的临床导师来提高学生临床学习效果。

**【关键词】** 临床环境；临床学习效果；临床教学；导师；导师制

**通信作者：**Ellemes Phuma-Ngaiyaye, E-mail: ephuma@yahoo.co.uk
